1 **One-year descriptive analysis of patients treated at an anti-rabies clinic – a retrospective**  
2 **study from Kashmir**

3 Khalid Bashir\*, Inaamul Haq†, S Muhammad Salim Khan‡, Mariya Amin Qurieshi†

4 \*M.B.B.S, D.A., MD Scholar, Department of Community Medicine, Government Medical College,  
5 Srinagar, Jammu & Kashmir, India

6 †M.D., Assistant Professor, Department of Community Medicine, Government Medical College,  
7 Srinagar, Jammu & Kashmir, India

8 ‡M.D., Professor and Head, Department of Community Medicine, Government Medical College,  
9 Srinagar, Jammu & Kashmir, India

10 Correspondence address:

11 Dr. Inaamul Haq

12 Assistant Professor

13 Department of Community Medicine

14 Government Medical College, Srinagar

15 Jammu & Kashmir, India

16 190010

17 Email: [haqinaam@yahoo.co.in](mailto:haqinaam@yahoo.co.in)

18 Phone: +91-9419467279

## 19 **Abstract**

20 **Background:** Dog bites in humans are a major public health problem in India in general and  
21 Kashmir in particular. Canine rabies is almost non-existent in developed countries and exists  
22 mainly in the poorer, low socioeconomic strata of society in the developing world. The  
23 objective of this study was to determine the characteristics, pattern, and burden of dog bite  
24 injuries in the Kashmir valley.

25 **Methodology and principal findings:** Data from Anti-Rabies Clinic of a tertiary care hospital in  
26 Srinagar, the summer capital of the state of Jammu & Kashmir, was collated and analyzed.  
27 Analysis of records of all the patients who had reported between April 2016 and March 2017  
28 was done. A total of 6172 patients had reported to the Anti-Rabies Clinic for management of  
29 animal bites from 1<sup>st</sup> April 2016 to 31<sup>st</sup> March 2017. Most of the patients were young males.  
30 Almost half (47.7%) of the patients were bitten in the afternoon. Lower limbs were the most  
31 common site of bite (71.7%). Most of the bites were of Category III (57.6%) followed by  
32 Category II (42.3%); only one case of Category I was recorded. Almost all (98.0%) cases reported  
33 being bitten by dogs.

34 **Conclusions:** Category III dog bites on lower limbs are the most common type of animal bites.  
35 Children have more chances of a bite on head and neck region. Serious and workable efforts  
36 have to be made to reduce the incidence and consequences of animal bites.

37 **Key Words:** Animal bites, dog, demographics, post-exposure prophylaxis.

38

## 39 **Author summary**

40 In Kashmir, dog bite is an important public health problem. Thousands of people become  
41 victims of an animal bite, especially dog bite, and some of them develop rabies. Rabies is an  
42 invariably fatal viral disease resulting in approximately 59 000 human deaths per year globally,  
43 with 95% of cases occurring in Africa and Asia. The only way to prevent a rabies death is  
44 vaccination of an animal bite victim. In Kashmir, the burden and characteristics of dog bites are  
45 not routinely captured by the health system in place. We, therefore, attempted to find out the  
46 burden and characteristics of animal bite victims by analyzing one-year data from an Anti-  
47 Rabies Clinic at a tertiary care hospital in Kashmir. We found that 98% of the patients registered  
48 at the clinic during the period were victims of a dog bite. The victims were mostly young males  
49 but females and children were not shown any mercy either. Lower limbs were the most favorite  
50 site of the bite. Our analysis of the data also revealed that children under 15 years were more  
51 prone to a bite in the head and neck region. We concluded that the burden of animal bites,  
52 especially dog bites, is huge in Kashmir and recommended that serious efforts directed towards  
53 immunizing and decreasing the stray dog population need to be put into practice to decrease  
54 the number of animal bite victims and prevent any rabies deaths.

55

## 56 **Introduction**

57 Rabies transmission by dog bites is one of the major public health problems, considering its  
58 palpable fear and anxiety, as it is a sinister zoonotic infection transmitted to humans or animals  
59 by the bite of a rabid animal. Rabies virus, which belongs to the Lyssavirus genus of the  
60 *Rhabdoviridae* family, causes fatal encephalitis [1]. It imposes high economic costs annually in  
61 various countries due to its high incidence [2,3]. Dog bites constitute more than 95% of human  
62 rabies cases and the rest is associated with a cat, fox and other carnivores in developing  
63 countries. A bite by a potentially rabid dog represents the source of infection in more than 99%  
64 of cases [4,5]. Among all PEP recipients, 30-50% are children <15 years of age and they also  
65 have the highest rabies mortality [6,7]. Dog rabies is almost non-existent in developed countries  
66 of Europe, North America, and Australia; but it is prevalent in the developing world. Lack of  
67 reliable data and unawareness of the burden and risk factors associated with human rabies  
68 together represent a critical challenge for the formulation of policies and strategies to control  
69 the disease and has been considered a major cause for underinvestment in rabies control  
70 measures in these countries [8]. In developing countries, the real number of sufferers is  
71 probably higher than the reported statistics [9]. In addition to the health importance in human-  
72 beings, disease outbreak among live-stock causes significant economic losses. Despite the  
73 preventability of rabies by effective and safe vaccines, the disease is still a healthcare problem  
74 in many countries, especially in Africa, Asia, and India [10]. Asia constitutes 96.5% of the burden  
75 of the disease in developing countries, which costs it 560 million USD annually [11,12].  
76 Rabies is invariably fatal, yet completely preventable if post-exposure prophylaxis (PEP) is  
77 applied in a timely and correct manner. The World Health Organization (WHO) has prepared

78 standard recommendations for PEP, which include immediate and thorough wound washing  
79 with soap and water, followed by administration of the vaccine and additionally, infiltration of  
80 Rabies Immunoglobulin in WHO category III bites [13].

81 In Kashmir, there is a huge and ever-increasing population of free-roaming stray dogs. The  
82 present study aims to generate a picture of the alarmingly increasing dog bite victims, potential  
83 cases of dreaded rabies, whose quality of physical and psychological health is directly or  
84 indirectly influenced by the event. Our objective was to determine the epidemiological  
85 features, characteristics, and pattern of dog bite victims who received PEP at a tertiary care  
86 center in Kashmir for one year. This will help in devising prevention strategies in view of the  
87 elimination of dog-mediated human rabies by 2030, as jointly outlined by WHO, FAO, OIE, the  
88 Global Alliance for Rabies Control, and the international community [14].

89

## 90 **Methods**

91 This study was conducted at the Anti-Rabies Clinic (ARC) of Shri Maharaja Hari Singh (SMHS)  
92 Hospital, Government Medical College, Srinagar, run by the Department of Community  
93 Medicine. The ARC receives animal bite cases from the whole of Kashmir valley which had a  
94 population of 6.9 million as per the 2011 census [15]. The ARC maintains records of  
95 demographic and clinical details of patients visiting the clinic for treatment. The clinic adheres  
96 to WHO-recommended protocol for PEP, which includes prompt wound washing, an anti-rabies  
97 vaccine for WHO Category II and III exposures, and use of Immunoglobulin in Category III  
98 exposures [13]. Following recommendations of the World Health Organization on PEP following  
99 animal bites in 2005, the ARC started the use of the intradermal regimen in 2011. Recently the

100 ARC has started the 2-site intradermal schedule as recommended by the recent WHO  
101 document [16].

102 The ARC follows a protocol for animal bite management which includes tetanus toxoid  
103 immunization for category II and III bites and Equine Rabies Immunoglobulin (ERIG) 40 IU/Kg  
104 body weight for category III bites. The ARC provides anti-rabies vaccines free of cost to the bite  
105 victims. ERIG is not provided free of cost. Patients need to purchase ERIG from the market. The  
106 health workers at the ARC are trained in the management of animal bites as well as the  
107 administration of the vaccine and ERIG.

108 We did an analysis of secondary data; records of the patients from 1<sup>st</sup> April 2016 to 31<sup>st</sup> March  
109 2017 were collated and analyzed. All data analyzed were anonymized. Demographic and clinical  
110 details of the patients were entered into a Microsoft Excel spreadsheet. From records, we took  
111 into consideration different variables for study analysis including age, sex, time, site, severity  
112 and WHO category of bite, type of animal involved and the residence of the patient.

113 Statistical analysis: Data was entered into a Microsoft Excel spreadsheet. Chi-square test was  
114 used to test independence between the site of bite versus age and sex. In order to further  
115 explore the relationship between site of bite and sex, analysis restricted to cases >15 years of  
116 age was done. Chi-squared goodness-of-fit was used to test if the number of cases varied across  
117 months. A p-value of less than 0.05 was considered statistically significant. SPSS version 23.0  
118 (IBM Corp. Released 2015. IBM SPSS Statistics for Windows, Version 23.0. Armonk, NY: IBM  
119 Corp.) was used for analyzing the data.

120

## 121 **Results**

122 A total of 6172 patients had reported to the ARC from 1<sup>st</sup> April 2016 to 31<sup>st</sup> March 2017. The  
123 demographic details of the patients are shown in Table 1. The bite victims were mostly young  
124 and middle-aged males.

125 Table 1: Demographic characteristics of animal bite victims

| Demographic characteristics | Number of bite victims (n=6172) | Percentage (%) |
|-----------------------------|---------------------------------|----------------|
| <b>Age (years)</b>          |                                 |                |
| ≤5                          | 426                             | 6.9            |
| 6-15                        | 986                             | 16.0           |
| 16-30                       | 1519                            | 24.6           |
| 31-50                       | 2278                            | 36.9           |
| 51-65                       | 773                             | 12.5           |
| >65                         | 190                             | 3.1            |
| <b>Sex</b>                  |                                 |                |
| Female                      | 1635                            | 26.5           |
| Male                        | 4537                            | 73.5           |
| <b>Residence</b>            |                                 |                |
| District Srinagar           | 3773                            | 61.1           |
| Other districts             | 2399                            | 38.9           |

126

127 The number of cases was highest during the months of March to May (Fig 1).

128 Table 2 describes the characteristics of animal bites. Almost half of the cases (47.7%) were  
129 bitten in the afternoon (1200 hours to 1759 hours). Lower limbs were the most common site of  
130 bite (71.7%). Ninety-eight percent of patients were bitten by a dog (6048/6172). Only one  
131 patient reported with a WHO category I bite.

132 Table 2: Characteristics of animal bites

| Bite characteristics | Number of bite victims (n=6172) | Percentage (%) |
|----------------------|---------------------------------|----------------|
|----------------------|---------------------------------|----------------|

**Time of bite\***

|                              |      |      |
|------------------------------|------|------|
| Morning (0600 to 0959 hrs)   | 920  | 14.9 |
| Forenoon (1000 to 1159 hrs)  | 1651 | 26.8 |
| Afternoon (1200 to 1759 hrs) | 2946 | 47.8 |
| Evening (1800 to 2159 hrs)   | 524  | 8.5  |
| Night (2200 to 0559 hrs)     | 121  | 2.0  |

**Site of bite injury†**

|               |      |      |
|---------------|------|------|
| Head and Neck | 237  | 3.8  |
| Trunk         | 156  | 2.5  |
| Upper Limb    | 1339 | 21.7 |
| Lower Limb    | 4424 | 71.7 |
| Others        | 23   | 0.4  |

**Biting animal**

|       |      |      |
|-------|------|------|
| Dog   | 6048 | 98.0 |
| Other | 124  | 2.0  |

**Category of bite**

|     |      |      |
|-----|------|------|
| I   | 1    | 0.02 |
| II  | 2613 | 42.3 |
| III | 3558 | 57.6 |

---

\*Time of bite was not available for 10 cases

†Percentages do not add up to 100 because of multiple bites in some cases

133

134 Table 3 analyzes the relationship between the site of bite versus age and sex. The site of the  
135 bite was significantly associated with age ( $p < 0.0001$ ). Lower limbs were the most common site  
136 of bite across all age and sex groups. However, under-five children were more likely to be bitten  
137 on the head, neck and trunk - adjusted standardized residual (ASR) 8.3 and 8.2, respectively.  
138 Young adults were more likely to be bitten on lower limbs than expected (ASR 3.7). Males were  
139 more likely to be bitten on lower limbs (ASR 2.4) and females were more likely to be bitten on  
140 upper limbs (ASR 2.7) than expected.



141 Table 3: Relationship of site of bite versus age and sex

|              |       | Site of bite           |                        |                          |                           | Total                    | p-value |
|--------------|-------|------------------------|------------------------|--------------------------|---------------------------|--------------------------|---------|
|              |       | Head and neck          | Trunk                  | Upper limbs              | Lower limbs               |                          |         |
| Age (years)  | <=5   | 48<br>(11.3%)<br>[8.3] | 36<br>(8.5%)<br>[8.2]  | 96<br>(22.6%)<br>[0.5]   | 245<br>(57.6%)<br>[-6.8]  | 425                      | <0.0001 |
|              | 6-15  | 43<br>(4.4%)<br>[1.0]  | 43<br>(4.4%)<br>[4.1]  | 185<br>(18.9%)<br>[-2.3] | 708<br>(72.3%)<br>[0.3]   | 979                      |         |
|              | 16-30 | 40<br>(2.6%)<br>[-2.8] | 22<br>(1.5%)<br>[-3.0] | 306<br>(20.2%)<br>[-1.6] | 1147<br>(75.7%)<br>[3.7]  | 1515                     |         |
|              | 31-50 | 73<br>(3.2%)<br>[-1.9] | 34<br>(1.5%)<br>[-3.9] | 524<br>(23.1%)<br>[2.1]  | 1633<br>(72.1%)<br>[0.2]  | 2264                     |         |
|              | 51-65 | 25<br>(3.3%)<br>[-0.9] | 15<br>(2.0%)<br>[-1.1] | 182<br>(23.7%)<br>[1.4]  | 547<br>(71.1%)<br>[-0.5]  | 769                      |         |
|              | >65   | 7<br>(3.7%)<br>[-0.1]  | 4<br>(2.1%)<br>[-0.4]  | 39<br>(20.5%)<br>[-0.4]  | 140<br>(73.7%)<br>[0.5]   | 190                      |         |
|              | Sex   | Male                   | 180<br>(4.0%)<br>[1.0] | 108<br>(2.4%)<br>[-1.0]  | 942<br>(20.8%)<br>[-2.7]  | 3288<br>(72.8%)<br>[2.4] |         |
| Female       |       | 56<br>(3.4%)<br>[-1.0] | 46<br>(2.8%)<br>[1.0]  | 390<br>(24.0%)<br>[2.7]  | 1132<br>(69.7%)<br>[-2.4] | 1624                     |         |
| <b>Total</b> |       | 236                    | 154                    | 1332                     | 4420                      | 6142*                    |         |

\*Those with bites at multiple sites and 'other' sites were excluded from this analysis

Figures in parentheses are row percentages

Figures in square brackets are adjusted standardized residuals

142

143

144 Analysis restricted to patients >15 years of age (Table 4) further revealed that as compared to

145 females, males were more likely than expected to be bitten on the head and neck region (ASR

146 2.9).

147 Table 4: Sex versus site of bite in animal bite victims >15 years of age

| Sex | Site of bite | Total | p-value |
|-----|--------------|-------|---------|
|-----|--------------|-------|---------|

|               | Head and neck          | Trunk                  | Upper limbs              | Lower limbs              |       |
|---------------|------------------------|------------------------|--------------------------|--------------------------|-------|
| <b>Male</b>   | 123<br>(3.5%)<br>[2.9] | 51<br>(1.4%)<br>[-1.3] | 741<br>(21.0%)<br>[-3.2] | 2611<br>(74.0%)<br>[2.3] | 3527  |
| <b>Female</b> | 22<br>(1.8%)<br>[-2.9] | 24<br>(2.0%)<br>[1.3]  | 309<br>(25.5%)<br>[3.2]  | 856<br>(70.7%)<br>[-2.3] | 1211  |
| <b>Total</b>  | 145                    | 75                     | 1051                     | 3467                     | 4738* |

\*Those with bites at multiple sites and 'other' sites were excluded from this analysis

Figures in parentheses are row percentages

Figures in square brackets are adjusted standardized residuals

148

149

## 150 Discussion

151 This study shows that dog bite-related injuries are very common in Kashmir. Category III dog  
152 bites on the lower limbs are the most common.

153 We analyzed data from the only ARC in Kashmir which mostly provides services to people from  
154 District Srinagar. In our study, 3773 out of a total of 6172 cases were from Srinagar. Animal bite  
155 cases are being managed at other hospitals in the District as well. During the study period, 2032  
156 animal bite cases were managed at these hospitals. This gives us a total of 5805 animal bite  
157 cases during the study period. We estimated the mid-interval population of Srinagar during the  
158 period of study to be 1290644 based on 2011 census data [16] for the district and the growth  
159 rates for urban areas of the state of Jammu & Kashmir reported by the Sample Registration  
160 System [17]. Thus, the estimated incidence of an animal bite in Srinagar during the one-year  
161 study period was 450 per 100,000 population. This is much higher than the incidence reported

162 from Kenya [18] (284 per 100,000), Tanzania [19] (74 per 100,000) and Ghana [20] (54.1 per  
163 100,000).

164 The cases were mostly middle-aged men (Table 1). But children and elderly were not spared.  
165 The youngest victim was an infant and the oldest victim was 97 years old. About 23% were  
166 children <15 years of age. Males outnumbered females. In Kashmir, males usually go out more  
167 frequently for work or for social visits as compared to females. Most of the available literature  
168 on dog bites has reported a male predominance [18,19,21–24]. The percentage of child victims  
169 varies across studies from 25% to 72% [18–26].

170 The ARC is situated in District Srinagar and that might be the reason why most of the cases in  
171 our study were from Srinagar. District hospitals and some of the sub-district level hospital in  
172 other districts of the region provide bite-management services to people in those areas.

173 Our analysis shows a definite rise in the number of cases during the months of March to May  
174 (Fig 1). Kashmir is a valley with the winter season starting in December and ending in February.  
175 People usually prefer to stay indoors during the period. Outdoor movement of people increases  
176 as the winter ends. This might have led to increased interaction with dogs and hence an  
177 increase in dog bite cases during the months following winter. A somewhat similar trend has  
178 been reported from Iran [21]. However, in a five-year study from Srilanka, Kularatne et al  
179 reported a more or less even pattern across seasons [24].

180 The afternoon was the most common time of animal bites (47.7%) followed by forenoon  
181 (26.7%) (Table 2). Every seventh case was bitten when he/she ventured out early morning,  
182 which people usually do for the morning prayers or for a visit to the bakery or some other work.

183 The most common site of the bite was lower limbs followed by upper limbs (Table 2). Seven  
184 patients had bites at more than one region. Consumption of milk from a rabid cow was the  
185 most common among the “others” category. Our results are similar to results from Kenya [18]  
186 and Nigeria [23]. Interestingly, an earlier study from Jos Plateau State of Nigeria [22] reported  
187 that 85% of victims were bitten on arms.

188 We found a significant relationship between a victim’s age and the site of an animal bite  
189 ( $p < 0.0001$ ) (Table 3). Lower limbs were the most common site of bite across all age and sex  
190 groups. A breakdown of table 3 using adjusted standardized residuals revealed that under-five  
191 and young children were more likely to be victims of an animal bite on the head, neck, and  
192 trunk.

193 Our results revealed a significant relationship between sex and the site of an animal bite  
194 ( $p = 0.0308$ , Table 3). In order to further delve into the relationship, we restricted our analysis to  
195 patients  $> 15$  years of age (Table 4) hypothesizing that any sex differentials in this context will  
196 come into play after puberty. To confirm our notion, we stratified the analysis by age. Among  
197 children up to 15 years of age, there was no significant relationship between sex and the site of  
198 the animal bite. The analysis revealed an interesting relationship. As compared to females,  
199 males were more likely to report with a bite in the head and neck region. Furthermore, upper  
200 limbs were a more likely site for an animal bite among females.

201 A dog was the biting animal in 98% of cases. Records lacked information about dog ownership.  
202 However, our experience with dog bites at the ARC has been that most of the cases are due to  
203 street dogs as people in the region do not usually keep a dog as a pet. Other animals included  
204 leopard, cat, and cow.

205 More than half of the cases (57.6%) were classified as category III bites and only one category I  
206 bite was recorded.

207 Animal bite victims suffer huge losses in the form of lost wages, travel costs, and direct  
208 treatment costs. Moreover, psychological and emotional denting is something which is difficult  
209 to translate. Scarring is a common consequence related to dog bites, and the resulting  
210 emotional distress due to cosmetic reasons should not be undermined, particularly for wounds  
211 on the face.

212 The biggest challenges in Africa and Asia, including Kashmir in particular, are free-roaming dog  
213 populations, limited veterinary and human health infrastructure, and absence of efficient  
214 communication between the veterinary and the human health sectors [27,28]. The absence of  
215 effective control over the growing dog population is proving costly in terms of DALYs,  
216 premature death and the cost of PEP to public and private health sectors [28,29]. There are  
217 conflicting reports about the number of stray dogs in Srinagar with numbers varying from as  
218 low as 22,000 to as high as 1,50,000 [30–32]. Whatever the actual number of stray dogs, there  
219 is a dire need to devise a strategy to control the alarmingly growing dog population.  
220 Unfortunately, there is no provision in our region for isolating suspected dogs or for diagnosing  
221 animal rabies. Measures like mass dog vaccination campaigns to improve herd immunity, as  
222 recommended by veterinarians, can reduce the burden of human rabies [30]. Animal rabies  
223 control requires more attention and must be done through local municipalities. Rabies  
224 elimination programs focused mainly on mass vaccination of dogs are largely justified by the  
225 future savings of human rabies prevention programs.

226

227 Limitations: This study was based on an analysis of records from an anti-rabies clinic. We,  
228 therefore, could not obtain information about the characteristics of the biting animal such as  
229 ownership or the circumstances of bite such as provocation. Information was not available  
230 about the receipt of tetanus vaccination and ERIG. Because of the secondary nature of the data,  
231 we could not validate the categorization of bite. However, during the study period bite  
232 categorization was done by trained health workers. The percentage of patients who completed  
233 PEP was also not available. We also could not evaluate the impact of animal bites on the  
234 physical and psychological health of the victims. An economic burden evaluation was also not  
235 possible. We could not draw the real picture of dog bite victims in Kashmir, as data analysis was  
236 limited to our hospital and many patients visit hospitals in the peripheries as well while some  
237 others miss PEP due to lack of knowledge.

238  
239 Conclusions: This study highlights the magnitude of animal bite injuries in Kashmir. Ninety-eight  
240 percent of patients had suffered injury from free roaming stray dogs. Category III bites on the  
241 lower limbs are the most common type of bite. Children are more prone to be bitten on the  
242 head, neck, and trunk. The burgeoning dog population takes a toll on quality of life in an explicit  
243 and implicit manner. It shakes up a person psychologically and emotionally which is often not  
244 perceived. Also, dog bites don't spare children and geriatric population; in fact, they are easy  
245 prey. It is time to take proactive measures to stop the menace of the growing dog population.

246

## 247 **References**

- 248 1. Hemachudha T, Ugolini G, Wacharapluesadee S, Sungkarat W, Shuangshoti S, Laothamatas  
249 J. Human rabies: neuropathogenesis, diagnosis, and management. *Lancet Neurol*. 2013  
250 May;12(5):498–513.
- 251 2. Hicks DJ, Fooks AR, Johnson N. Developments in rabies vaccines. *Clin Exp Immunol*. 2012  
252 Sep;169(3):199–204.
- 253 3. Susilawathi NM, Darwinata AE, Dwija IB, Budayanti NS, Wirasandhi GA, Subrata K, et al.  
254 Epidemiological and clinical features of human rabies cases in Bali 2008-2010. *BMC Infect*  
255 *Dis* [Internet]. 2012 Dec [cited 2019 Feb 13];12(1). Available from:  
256 <http://bmcinfectdis.biomedcentral.com/articles/10.1186/1471-2334-12-81>
- 257 4. Expert Consultation on Rabies, World Health Organisation, editors. WHO Expert  
258 Consultation on Rabies: first report ; [Geneva from 5 to 8 October 2004]. Geneva: WHO;  
259 2005. 88 p. (WHO technical report series).
- 260 5. Rabies [Internet]. [cited 2019 Feb 13]. Available from: [https://www.who.int/news-](https://www.who.int/news-room/fact-sheets/detail/rabies)  
261 [room/fact-sheets/detail/rabies](https://www.who.int/news-room/fact-sheets/detail/rabies)
- 262 6. Cleaveland S. Estimating human rabies mortality in the United Republic of Tanzania from  
263 dog bite injuries. *Bull World Health Organ*. 2002;80:304-310.
- 264 7. WHO | Rabies vaccines: WHO position paper [Internet]. WHO. [cited 2019 Feb 13].  
265 Available from: [http://www.who.int/rabies/resources/who\\_wer8532/en/](http://www.who.int/rabies/resources/who_wer8532/en/)

- 266 8. Hampson K, Coudeville L, Lembo T, Sambo M, Kieffer A, Attlan M, et al. Estimating the  
267 Global Burden of Endemic Canine Rabies. *PLoS Negl Trop Dis*. 2015 Apr 16;9(4):e0003709.
- 268 9. Abbas SS, Venkataramanan V, Pathak G, Kakkar M. Rabies control initiative in Tamil Nadu,  
269 India: a test case for the 'One Health' approach. *Int Health*. 2011 Dec;3(4):231–9.
- 270 10. Bahonar A., Rashidi H, Simani S, Fayaz A, Haghdoost A., Rezaei-nassab M, et al. Relative  
271 frequency of animal rabies and factors affecting it in Kerman province, 1993 - 2003. *J Sch*  
272 *Public Health Inst Public Health Res* [Internet]. 2007;5(1). Available from:  
273 <http://sjsph.tums.ac.ir/article-1-186-en.html>
- 274 11. Hanlon C., Niezgodna M, Morrill P., Rupprecht C. The incurable wound revisited: progress in  
275 human rabies prevention? *Vaccine*. 2001 Mar;19(17–19):2273–9.
- 276 12. Zeynali M, Fayaz A, Nadim A. Animal Bites and Rabies: Situation in Iran. *Archives of Iranian*  
277 *Medicine*. 1999 Jul;2(3). Available from: [www.ams.ac.ir/AIM/9923/zeynali9923.html](http://www.ams.ac.ir/AIM/9923/zeynali9923.html)
- 278 13. Expert Consultation on Rabies, World Health Organization, editors. WHO Expert  
279 Consultation on Rabies: second report ; [Geneva from 18 to 20 September 2012]. Geneva:  
280 WHO; 2013. 139 p. (WHO technical report series).
- 281 14. WHO | Global elimination of dog-mediated human rabies [Internet]. WHO. [cited 2019 Feb  
282 13]. Available from: [http://www.who.int/rabies/resources/who\\_hm\\_ntd\\_nzd\\_2016.02/en/](http://www.who.int/rabies/resources/who_hm_ntd_nzd_2016.02/en/)



- 283 15. Census of India Website : Office of the Registrar General & Census Commissioner, India  
284 [Internet]. [cited 2019 Feb 13]. Available from:  
285 [http://www.censusindia.gov.in/2011census/population\\_enumeration.html](http://www.censusindia.gov.in/2011census/population_enumeration.html)
- 286 16. World Health Organization (WHO) and World Organisation for Animal Health (OIE). Global  
287 elimination of dog-mediated human rabies: report of the Rabies Global Conference; 2015  
288 Dec 10-11; Geneva, Switzerland: WHO;c2016.
- 289 17. Census of India Website : Office of the Registrar General & Census Commissioner, India  
290 [Internet]. [cited 2019 Feb 13]. Available from:  
291 [http://censusindia.gov.in/vital\\_statistics/SRS\\_Bulletins/Bulletins.html](http://censusindia.gov.in/vital_statistics/SRS_Bulletins/Bulletins.html)
- 292 18. Ngugi JN, Maza AK, Omolo OJ, Obonyo M. Epidemiology and surveillance of human animal-  
293 bite injuries and rabies post-exposure prophylaxis, in selected counties in Kenya, 2011–  
294 2016. BMC Public Health [Internet]. 2018 Dec [cited 2019 Feb 13];18(1). Available from:  
295 <https://bmcpublichealth.biomedcentral.com/articles/10.1186/s12889-018-5888-5>
- 296 19. De Nardo P, Gentilotti E, Vairo F, Nguhuni B, Chaula Z, Nicastrì E, et al. A retrospective  
297 evaluation of bites at risk of rabies transmission across 7 years: The need to improve  
298 surveillance and reporting systems for rabies elimination. PLOS ONE. 2018 Jul  
299 2;13(7):e0197996.
- 300 20. Punguyire DT, Osei-Tutu A, Aleser EV, Letsa T. Level and pattern of human rabies and dog  
301 bites in Techiman Municipality in the Middle Belt of Ghana: a six year retrospective records

- 302 review. Pan Afr Med J [Internet]. 2017 [cited 2019 Feb 13];28. Available from:  
303 <http://www.panafrican-med-journal.com/content/article/28/281/full/>
- 304 21. Khazaei S, shiraz medical university, Karami M, Veisani Y, Solgi M, Goodarzi S. Epidemiology  
305 of Animal Bites and Associated Factors with Delay in Post-Exposure Prophylaxis; A Cross-  
306 Sectional Study. Bull Emerg Trauma. 2018 Jun 1;6(3):239–44.
- 307 22. Alabi O, Nguku P, Chukwukere S, Gaddo A, Nsubuga P, Umoh J. Profile of dog bite victims in  
308 Jos Plateau State, Nigeria: a review of dog bite records (2006-2008). Pan Afr Med J.  
309 2014;18(Supp 1):12.
- 310 23. Ogundare EO, Olatunya OS, Oluwayemi IO, Inubile AJ, Taiwo AB, Agaja OT, et al. Pattern and  
311 outcome of dog bite injuries among children in Ado-Ekiti, Southwest Nigeria. Pan Afr Med J  
312 [Internet]. 2017 [cited 2019 Feb 13];27. Available from: [http://www.panafrican-med-](http://www.panafrican-med-journal.com/content/article/27/81/full/)  
313 [journal.com/content/article/27/81/full/](http://www.panafrican-med-journal.com/content/article/27/81/full/)
- 314 24. Kularatne SAM, Ralapanawa DMP, Weerakoon K, Bokalamulla UK, Abagaspiya N. Pattern  
315 of animal bites and post exposure prophylaxis in rabies: A five year study in a tertiary care  
316 unit in Sri Lanka. BMC Infect Dis [Internet]. 2015 Dec [cited 2019 Feb 13];16(1). Available  
317 from: <http://www.biomedcentral.com/1471-2334/16/62>
- 318 25. Gautret P, Le Roux S, Faucher B, Gaudart J, Brouqui P, Parola P. Epidemiology of urban dog-  
319 related injuries requiring rabies post-exposure prophylaxis in Marseille, France. Int J Infect  
320 Dis. 2013 Mar;17(3):e164–7.

- 321 26. Abubakar S, Bakari A. Incidence of dog bite injuries and clinical rabies in a tertiary health  
322 care institution: A 10-year retrospective study. *Ann Afr Med.* 2012;11(2):108-11.
- 323 27. Knobel DL, Cleaveland S, Coleman PG, Fèvre EM, Meltzer MI, Miranda MEG, et al. Re-  
324 evaluating the burden of rabies in Africa and Asia. *Bull World Health Organ.* 2005;83:360-8.
- 325 28. Meltzer MI, Rupprecht CE. A Review of the Economics of the Prevention and Control of  
326 Rabies: Part 2: Rabies in Dogs, Livestock and Wildlife. *PharmacoEconomics.* 1998;14(5):481–  
327 98.
- 328 29. Anderson A, Shwiff SA. The Cost of Canine Rabies on Four Continents. *Transbound Emerg*  
329 *Dis.* 2015 Aug;62(4):446–52.
- 330 30. Gongal G, Wright AE. Human Rabies in the WHO Southeast Asia Region: Forward Steps for  
331 Elimination. *Adv Prev Med.* 2011;2011:1–5.
- 332 31. In Srinagar dog population goes down as dog bite cases increases [Internet]. [cited 2019 Feb  
333 13]. Available from: [https://www.outlookindia.com/website/story/in-srinagar-dog-](https://www.outlookindia.com/website/story/in-srinagar-dog-population-goes-down-says-jk-govt-as-dog-bite-cases-increases-fr/311678)  
334 [population-goes-down-says-jk-govt-as-dog-bite-cases-increases-fr/311678](https://www.outlookindia.com/website/story/in-srinagar-dog-population-goes-down-says-jk-govt-as-dog-bite-cases-increases-fr/311678)
- 335 32. Kashmir: When the dogs came marching in – The Express Tribune Blog [Internet]. [cited  
336 2019 Feb 13]. Available from: [https://blogs.tribune.com.pk/story/11594/kashmir-when-](https://blogs.tribune.com.pk/story/11594/kashmir-when-the-dogs-came-marching-in/)  
337 [the-dogs-came-marching-in/](https://blogs.tribune.com.pk/story/11594/kashmir-when-the-dogs-came-marching-in/)
- 338
- 339

340 **Fig 1. Monthly distribution of animal bite cases.**

341 Dash line indicates the monthly average of animal bite cases. The cases were the highest during  
342 the months following the winter months.

343

344 **Supporting Information Legends**

345 S1 Checklist: STROBE checklist

346 S2 Data: Anonymized data sheet

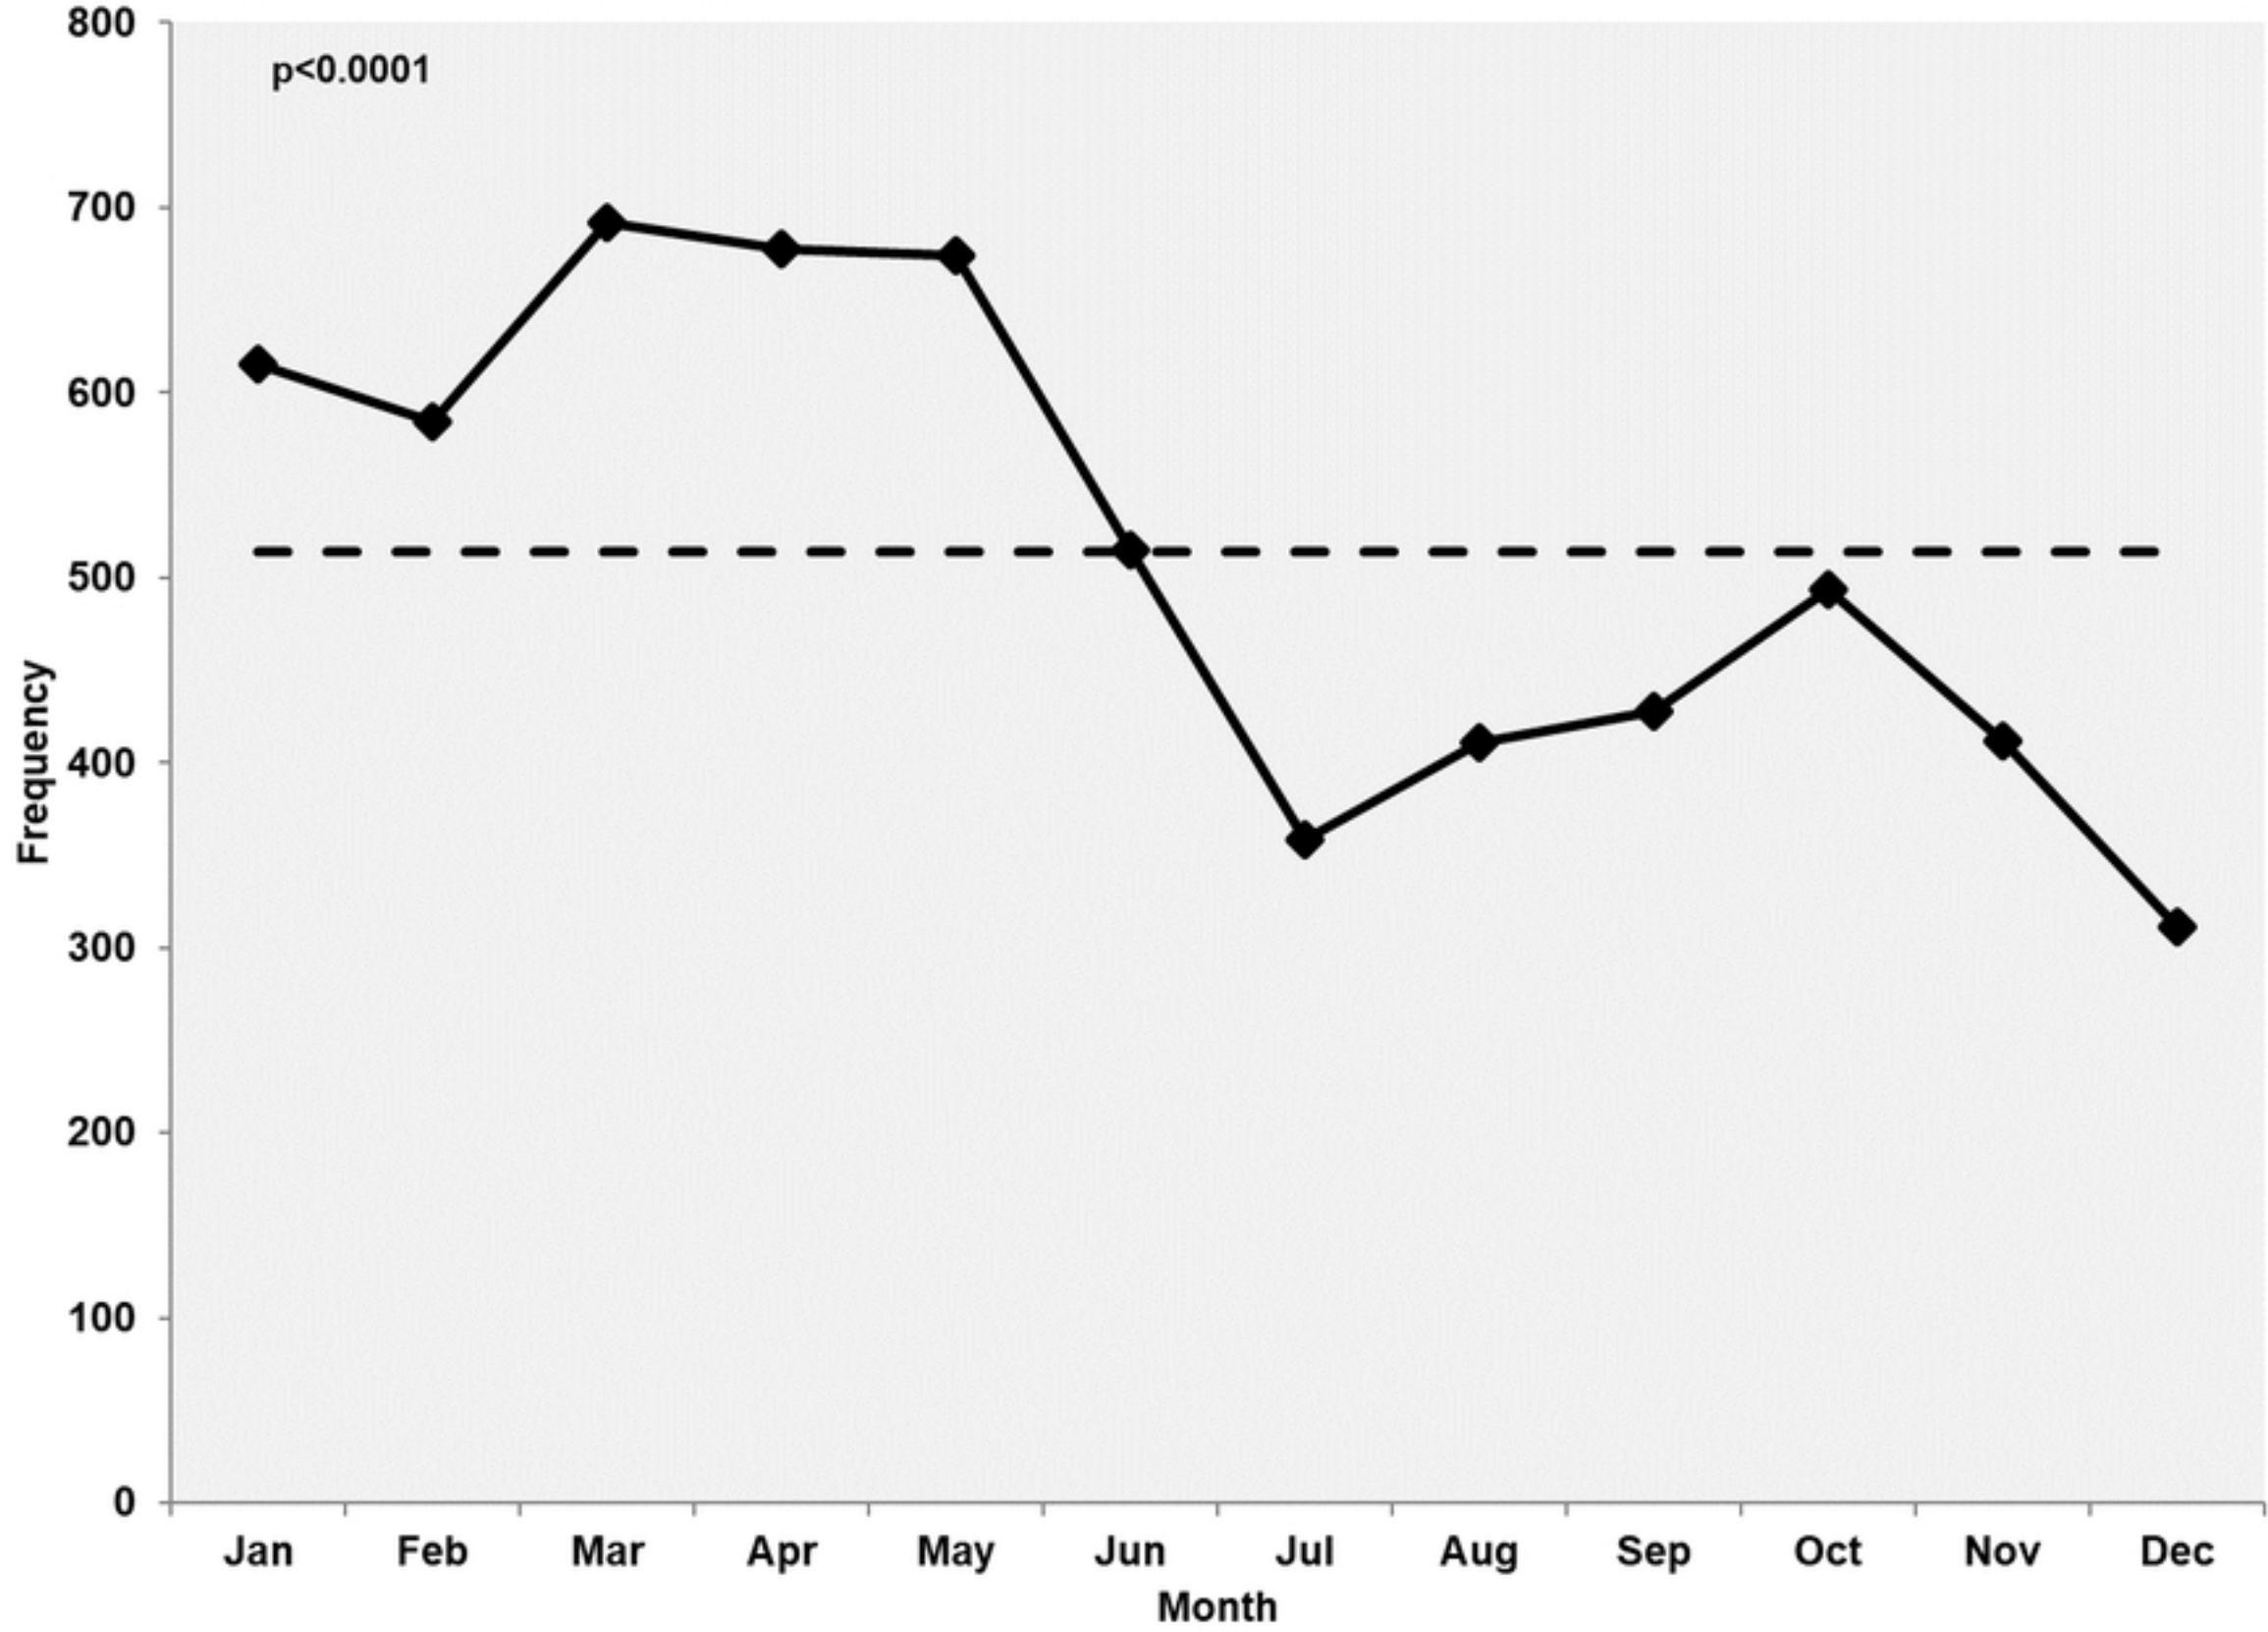

Fig 1
